# Supplementary material for: Harnessing Qatar Biobank to understand type 2 diabetes and obesity in adult Qataris from the First Qatar Biobank Project
Source: Springer Nature journal article supplement (doi:10.1186/s12967-018-1472-0), 2018-04-12
Supplement: MOESM2 [file 15631834]

# Harnessing Qatar Biobank to Understand Type 2 Diabetes and Obesity in Adult Qataris from the First Qatar Biobank Project

Ehsan Ullah, Raghvendra Mall, Reda Rawi, Naima M Moustaid,  
Adeel A Butt, Halima Bensmail

## Gender Stratified Analysis

### Baseline Statistics

Table 1: Baseline characteristics for males in diabetes study. (Rows are sorted by significance)

|                                   | Diabetic ( $n = 160$ ) | Non-Diabetic ( $n = 454$ ) | P-value                |
|-----------------------------------|------------------------|----------------------------|------------------------|
| Age                               | $48.92 \pm 10.69$      | $38.51 \pm 11.51$          | $5.54 \times 10^{-22}$ |
| Magnesium                         | $0.8 \pm 0.07$         | $0.85 \pm 0.06$            | $4.92 \times 10^{-18}$ |
| Chloride                          | $99.17 \pm 2.5$        | $101.02 \pm 1.93$          | $2.72 \times 10^{-15}$ |
| Uric Acid                         | $298.29 \pm 78.49$     | $351.46 \pm 67.79$         | $5.25 \times 10^{-13}$ |
| Sodium                            | $139.28 \pm 2.37$      | $140.74 \pm 2.13$          | $1.33 \times 10^{-12}$ |
| Albumin                           | $45.12 \pm 2.6$        | $46.46 \pm 2.56$           | $2.24 \times 10^{-08}$ |
| Free triiodothyronine             | $4.4 \pm 0.58$         | $4.68 \pm 0.59$            | $1.81 \times 10^{-07}$ |
| Folate Serum                      | $25.84 \pm 7.5$        | $23.3 \pm 7.81$            | $3.79 \times 10^{-04}$ |
| High Density Lipoprotein (HDL-C)  | $1.1 \pm 0.29$         | $1.19 \pm 0.29$            | $5.70 \times 10^{-04}$ |
| Triglycerides                     | $1.93 \pm 1.09$        | $1.58 \pm 1.19$            | $9.18 \times 10^{-04}$ |
| Total Bilirubin                   | $7.18 \pm 3.41$        | $8.31 \pm 5.06$            | $1.74 \times 10^{-03}$ |
| Homocysteine                      | $9.04 \pm 2.66$        | $9.85 \pm 3.42$            | $2.27 \times 10^{-03}$ |
| Insulin                           | $26.11 \pm 32.82$      | $17.36 \pm 24.6$           | $2.33 \times 10^{-03}$ |
| Serum Creatinine                  | $74.53 \pm 13.72$      | $79.87 \pm 33.35$          | $5.17 \times 10^{-03}$ |
| Vit. D                            | $19.9 \pm 9.75$        | $17.61 \pm 9.02$           | $7.13 \times 10^{-03}$ |
| BMI                               | $29.7 \pm 5.21$        | $28.5 \pm 5.09$            | $1.11 \times 10^{-02}$ |
| C-Reactive Protein                | $7.68 \pm 6.18$        | $6.33 \pm 5.06$            | $1.34 \times 10^{-02}$ |
| Low Density Lipoprotein (LDL-C)   | $2.92 \pm 0.96$        | $3.11 \pm 0.91$            | $2.33 \times 10^{-02}$ |
| GGT                               | $42.12 \pm 38.7$       | $33.9 \pm 42.62$           | $3.20 \times 10^{-02}$ |
| AST (GOT)                         | $20.68 \pm 8.42$       | $22.41 \pm 13.93$          | $6.38 \times 10^{-02}$ |
| Cholesterol                       | $4.85 \pm 1.09$        | $5.01 \pm 0.98$            | $8.48 \times 10^{-02}$ |
| C-Peptide of insulin              | $3.43 \pm 2.48$        | $3.07 \pm 2.04$            | $1.00 \times 10^{-01}$ |
| Creatine Kinase                   | $133.5 \pm 115.99$     | $156.66 \pm 229.71$        | $1.02 \times 10^{-01}$ |
| Phosphorus                        | $1.12 \pm 0.18$        | $1.13 \pm 0.19$            | $3.08 \times 10^{-01}$ |
| Hemoglobin                        | $14.7 \pm 1.23$        | $14.81 \pm 1.07$           | $3.33 \times 10^{-01}$ |
| Thyroid Stimulating Hormone (TSH) | $1.63 \pm 1.19$        | $1.87 \pm 4.91$            | $3.47 \times 10^{-01}$ |
| Vitamin B12                       | $334.45 \pm 179.1$     | $322.09 \pm 161.78$        | $4.20 \times 10^{-01}$ |
| Alkaline Phosphatase (ALP)        | $71.99 \pm 20.14$      | $70.63 \pm 18.74$          | $4.41 \times 10^{-01}$ |
| Free Thyroxine                    | $13.21 \pm 1.38$       | $13.31 \pm 1.66$           | $4.54 \times 10^{-01}$ |
| Calcium                           | $2.4 \pm 0.09$         | $2.4 \pm 0.09$             | $5.69 \times 10^{-01}$ |
| ALT (GPT)                         | $30.11 \pm 16.56$      | $29.73 \pm 22.39$          | $8.22 \times 10^{-01}$ |
| Potassium                         | $4.39 \pm 0.3$         | $4.39 \pm 0.32$            | $9.49 \times 10^{-01}$ |

Table 2: Baseline characteristics for females in diabetes study. (Rows are sorted by significance)

|                                   | Diabetic ( $n = 152$ ) | Non-Diabetic ( $n = 444$ ) | P-value                |
|-----------------------------------|------------------------|----------------------------|------------------------|
| Age                               | $53.16 \pm 8.8$        | $39.53 \pm 12.72$          | $1.60 \times 10^{-38}$ |
| Triglycerides                     | $1.71 \pm 0.81$        | $1.19 \pm 0.71$            | $1.25 \times 10^{-11}$ |
| Alkaline Phosphatase (ALP)        | $81.35 \pm 21.03$      | $68.23 \pm 20.68$          | $4.16 \times 10^{-11}$ |
| Magnesium                         | $0.78 \pm 0.09$        | $0.83 \pm 0.06$            | $1.07 \times 10^{-10}$ |
| Chloride                          | $99.72 \pm 2.7$        | $101.34 \pm 2.04$          | $1.13 \times 10^{-10}$ |
| BMI                               | $33.23 \pm 6.13$       | $29.61 \pm 6.66$           | $6.25 \times 10^{-09}$ |
| Vit. D                            | $23.95 \pm 9.32$       | $18.71 \pm 9.73$           | $1.17 \times 10^{-08}$ |
| High Density Lipoprotein (HDL-C)  | $1.33 \pm 0.33$        | $1.49 \pm 0.35$            | $1.90 \times 10^{-06}$ |
| GGT                               | $33.32 \pm 32.71$      | $20.51 \pm 20.51$          | $1.01 \times 10^{-05}$ |
| Albumin                           | $43.33 \pm 2.82$       | $44.46 \pm 2.81$           | $2.08 \times 10^{-05}$ |
| Vitamin B12                       | $369.02 \pm 247.06$    | $285.97 \pm 149.7$         | $1.30 \times 10^{-04}$ |
| Calcium                           | $2.4 \pm 0.1$          | $2.37 \pm 0.1$             | $3.50 \times 10^{-04}$ |
| Free triiodothyronine             | $4.2 \pm 0.82$         | $4.46 \pm 0.65$            | $3.60 \times 10^{-04}$ |
| C-Peptide of insulin              | $3.17 \pm 1.78$        | $2.6 \pm 1.46$             | $4.07 \times 10^{-04}$ |
| Insulin                           | $27.91 \pm 56.3$       | $12.2 \pm 10.28$           | $8.00 \times 10^{-04}$ |
| ALT (GPT)                         | $22.19 \pm 12.94$      | $17.63 \pm 17.9$           | $8.10 \times 10^{-04}$ |
| C-Reactive Protein                | $8.7 \pm 5.83$         | $7.16 \pm 5.13$            | $3.93 \times 10^{-03}$ |
| Free Thyroxine                    | $14.14 \pm 2.44$       | $13.72 \pm 2.01$           | $5.76 \times 10^{-02}$ |
| Uric Acid                         | $268.82 \pm 75.94$     | $256.39 \pm 64.1$          | $7.16 \times 10^{-02}$ |
| Total Bilirubin                   | $5.63 \pm 2.45$        | $6.05 \pm 3.15$            | $8.77 \times 10^{-02}$ |
| Sodium                            | $139.48 \pm 2.71$      | $139.85 \pm 2.29$          | $1.34 \times 10^{-01}$ |
| Phosphorus                        | $1.19 \pm 0.15$        | $1.17 \pm 0.15$            | $1.39 \times 10^{-01}$ |
| Homocysteine                      | $7.86 \pm 2.59$        | $8.2 \pm 2.46$             | $1.41 \times 10^{-01}$ |
| AST (GOT)                         | $18.89 \pm 9.42$       | $17.53 \pm 10.32$          | $1.50 \times 10^{-01}$ |
| Thyroid Stimulating Hormone (TSH) | $1.83 \pm 1.36$        | $2.21 \pm 5.23$            | $1.57 \times 10^{-01}$ |
| Creatine Kinase                   | $82.32 \pm 78.87$      | $73.44 \pm 41.57$          | $1.86 \times 10^{-01}$ |
| Folate Serum                      | $27.31 \pm 8.07$       | $26.37 \pm 7.79$           | $2.06 \times 10^{-01}$ |
| Hemoglobin                        | $12.51 \pm 1.25$       | $12.38 \pm 1.25$           | $2.77 \times 10^{-01}$ |
| Cholesterol                       | $5 \pm 1.11$           | $4.92 \pm 0.88$            | $4.55 \times 10^{-01}$ |
| Potassium                         | $4.39 \pm 0.31$        | $4.37 \pm 0.37$            | $5.09 \times 10^{-01}$ |
| Low Density Lipoprotein (LDL-C)   | $2.87 \pm 0.96$        | $2.91 \pm 0.79$            | $6.54 \times 10^{-01}$ |
| Serum Creatinine                  | $56.97 \pm 14.09$      | $56.54 \pm 8.91$           | $7.25 \times 10^{-01}$ |

Table 3: Baseline characteristics for males in obesity study. (Rows are sorted by significance)

|                                   | Obese ( $n = 203$ ) | Normal ( $n = 122$ ) | P-value                |
|-----------------------------------|---------------------|----------------------|------------------------|
| C-Peptide of insulin              | $3.83 \pm 2.49$     | $2.4 \pm 1.64$       | $1.50 \times 10^{-09}$ |
| High Density Lipoprotein (HDL-C)  | $1.11 \pm 0.27$     | $1.29 \pm 0.29$      | $8.65 \times 10^{-09}$ |
| Triglycerides                     | $1.88 \pm 1.46$     | $1.26 \pm 0.67$      | $3.29 \times 10^{-07}$ |
| Insulin                           | $26.35 \pm 35.89$   | $12.26 \pm 13.11$    | $7.58 \times 10^{-07}$ |
| Albumin                           | $45.43 \pm 2.54$    | $46.88 \pm 2.67$     | $1.78 \times 10^{-06}$ |
| Uric Acid                         | $347.47 \pm 77.57$  | $311.66 \pm 55.68$   | $8.47 \times 10^{-06}$ |
| ALT (GPT)                         | $32.43 \pm 24.96$   | $24.99 \pm 14.4$     | $7.38 \times 10^{-04}$ |
| Total Bilirubin                   | $7.31 \pm 4.78$     | $9.31 \pm 5.64$      | $1.25 \times 10^{-03}$ |
| Free Thyroxine                    | $13.06 \pm 1.39$    | $13.61 \pm 1.47$     | $1.31 \times 10^{-03}$ |
| Age                               | $43.12 \pm 11.37$   | $38.84 \pm 13.68$    | $4.04 \times 10^{-03}$ |
| GGT                               | $41.95 \pm 55.7$    | $28.55 \pm 27.75$    | $4.21 \times 10^{-03}$ |
| HBA1C %                           | $6.44 \pm 1.73$     | $5.94 \pm 1.43$      | $4.83 \times 10^{-03}$ |
| Cholesterol                       | $5.03 \pm 1.02$     | $4.72 \pm 0.93$      | $6.71 \times 10^{-03}$ |
| Vit. D                            | $16.77 \pm 7.27$    | $19.17 \pm 10.5$     | $2.70 \times 10^{-02}$ |
| AST (GOT)                         | $23 \pm 14.64$      | $20.44 \pm 6.22$     | $3.00 \times 10^{-02}$ |
| Calcium                           | $2.39 \pm 0.09$     | $2.42 \pm 0.09$      | $3.04 \times 10^{-02}$ |
| Vitamin B12                       | $306.36 \pm 120.77$ | $350.68 \pm 206.4$   | $3.22 \times 10^{-02}$ |
| Free triiodothyronine             | $4.54 \pm 0.49$     | $4.67 \pm 0.65$      | $4.28 \times 10^{-02}$ |
| Magnesium                         | $0.83 \pm 0.07$     | $0.85 \pm 0.07$      | $4.50 \times 10^{-02}$ |
| Low Density Lipoprotein (LDL-C)   | $3.08 \pm 0.89$     | $2.88 \pm 0.84$      | $4.53 \times 10^{-02}$ |
| Glucose                           | $6.94 \pm 3.39$     | $6.24 \pm 2.94$      | $5.91 \times 10^{-02}$ |
| Chloride                          | $100.56 \pm 2.31$   | $100.25 \pm 2.21$    | $2.41 \times 10^{-01}$ |
| Potassium                         | $4.38 \pm 0.29$     | $4.34 \pm 0.34$      | $2.68 \times 10^{-01}$ |
| Sodium                            | $140.18 \pm 2.1$    | $140.43 \pm 2.45$    | $3.16 \times 10^{-01}$ |
| C-Reactive Protein                | $7.22 \pm 6.09$     | $6.57 \pm 7.1$       | $3.77 \times 10^{-01}$ |
| Phosphorus                        | $1.11 \pm 0.17$     | $1.13 \pm 0.19$      | $6.25 \times 10^{-01}$ |
| Thyroid Stimulating Hormone (TSH) | $1.63 \pm 1.26$     | $1.7 \pm 2.66$       | $7.57 \times 10^{-01}$ |
| Serum Creatinine                  | $77.58 \pm 14.56$   | $77.19 \pm 10.62$    | $7.79 \times 10^{-01}$ |
| Alkaline Phosphatase (ALP)        | $71.64 \pm 20.61$   | $72.16 \pm 19.41$    | $8.21 \times 10^{-01}$ |
| Homocysteine                      | $9.76 \pm 3.21$     | $9.8 \pm 4.04$       | $9.09 \times 10^{-01}$ |
| Creatine Kinase                   | $150.7 \pm 134.29$  | $149.91 \pm 192.61$  | $9.67 \times 10^{-01}$ |
| Folate Serum                      | $23.63 \pm 7.29$    | $23.61 \pm 7.77$     | $9.83 \times 10^{-01}$ |
| Hemoglobin                        | $14.75 \pm 1.1$     | $14.76 \pm 1.08$     | $9.83 \times 10^{-01}$ |

Table 4: Baseline characteristics for females in obesity study. (Rows are sorted by significance)

|                                   | Obese ( $n = 305$ ) | Normal ( $n = 102$ ) | P-value                |
|-----------------------------------|---------------------|----------------------|------------------------|
| Age                               | $46.85 \pm 11.81$   | $30.46 \pm 9.6$      | $4.28 \times 10^{-32}$ |
| Albumin                           | $43.16 \pm 2.52$    | $46.24 \pm 2.51$     | $1.39 \times 10^{-23}$ |
| C-Peptide of insulin              | $3.15 \pm 1.65$     | $1.88 \pm 0.96$      | $8.64 \times 10^{-19}$ |
| HBA1C %                           | $6.58 \pm 1.61$     | $5.41 \pm 0.96$      | $7.66 \times 10^{-17}$ |
| Triglycerides                     | $1.43 \pm 0.71$     | $0.9 \pm 0.51$       | $2.08 \times 10^{-14}$ |
| Uric Acid                         | $275.72 \pm 68.94$  | $224.59 \pm 50.39$   | $4.40 \times 10^{-14}$ |
| Alkaline Phosphatase (ALP)        | $76.99 \pm 21.43$   | $60.51 \pm 16.62$    | $5.79 \times 10^{-14}$ |
| C-Reactive Protein                | $8.92 \pm 6.06$     | $5.62 \pm 2.82$      | $8.75 \times 10^{-13}$ |
| High Density Lipoprotein (HDL-C)  | $1.38 \pm 0.32$     | $1.63 \pm 0.35$      | $1.86 \times 10^{-10}$ |
| Glucose                           | $6.88 \pm 3.45$     | $5.02 \pm 2.13$      | $5.41 \times 10^{-10}$ |
| Magnesium                         | $0.8 \pm 0.07$      | $0.84 \pm 0.06$      | $1.30 \times 10^{-06}$ |
| Insulin                           | $20.38 \pm 40.59$   | $8.64 \pm 7.18$      | $2.02 \times 10^{-06}$ |
| GGT                               | $26.47 \pm 25.31$   | $15.49 \pm 17.69$    | $2.41 \times 10^{-06}$ |
| Chloride                          | $100.62 \pm 2.32$   | $101.6 \pm 1.96$     | $5.03 \times 10^{-05}$ |
| Creatine Kinase                   | $79.54 \pm 54.82$   | $63.9 \pm 27.59$     | $2.00 \times 10^{-04}$ |
| Total Bilirubin                   | $5.44 \pm 2.65$     | $6.87 \pm 3.53$      | $2.39 \times 10^{-04}$ |
| Serum Creatinine                  | $57.77 \pm 10.82$   | $54.71 \pm 7.02$     | $1.13 \times 10^{-03}$ |
| Calcium                           | $2.37 \pm 0.11$     | $2.39 \pm 0.08$      | $1.57 \times 10^{-02}$ |
| Phosphorus                        | $1.17 \pm 0.15$     | $1.2 \pm 0.13$       | $2.16 \times 10^{-02}$ |
| Thyroid Stimulating Hormone (TSH) | $2.15 \pm 2.78$     | $1.7 \pm 1.26$       | $2.81 \times 10^{-02}$ |
| Vit. D                            | $20.23 \pm 8.74$    | $17.65 \pm 11.53$    | $4.00 \times 10^{-02}$ |
| Cholesterol                       | $4.96 \pm 0.89$     | $4.75 \pm 0.82$      | $4.75 \times 10^{-02}$ |
| Low Density Lipoprotein (LDL-C)   | $2.93 \pm 0.82$     | $2.75 \pm 0.74$      | $5.50 \times 10^{-02}$ |
| Potassium                         | $4.37 \pm 0.34$     | $4.45 \pm 0.4$       | $7.00 \times 10^{-02}$ |
| Hemoglobin                        | $12.26 \pm 1.33$    | $12.5 \pm 1.11$      | $7.04 \times 10^{-02}$ |
| Free triiodothyronine             | $4.35 \pm 0.66$     | $4.49 \pm 0.58$      | $7.20 \times 10^{-02}$ |
| Free Thyroxine                    | $13.79 \pm 2.13$    | $13.98 \pm 1.7$      | $3.56 \times 10^{-01}$ |
| ALT (GPT)                         | $19.09 \pm 10.87$   | $16.7 \pm 32.8$      | $4.71 \times 10^{-01}$ |
| Homocysteine                      | $8.34 \pm 2.63$     | $8.14 \pm 2.53$      | $4.87 \times 10^{-01}$ |
| Folate Serum                      | $26.47 \pm 7.96$    | $25.65 \pm 7.2$      | $4.92 \times 10^{-01}$ |
| Sodium                            | $139.71 \pm 2.57$   | $139.88 \pm 2.11$    | $5.12 \times 10^{-01}$ |
| AST (GOT)                         | $17.57 \pm 6.77$    | $18.11 \pm 19.31$    | $7.84 \times 10^{-01}$ |
| Vitamin B12                       | $302.49 \pm 176.64$ | $299.54 \pm 184.57$  | $8.84 \times 10^{-01}$ |

# Regularization Methods

Table 5: Significant results of elastic net, glinternet, lasso proj and hdi. (Rows are sorted by the absolute value of elastic net coefficients)

|                                 | elastic net<br>coefficient ( $\beta$ ) | glinetnet<br>coefficient ( $\beta$ ) | lasso proj<br>P-value  | hdi<br>P-value         |
|---------------------------------|----------------------------------------|--------------------------------------|------------------------|------------------------|
| <b>Diabetes Study (Males)</b>   |                                        |                                      |                        |                        |
| Magnesium                       | $-9.23 \times 10^{-1}$                 | $-1.50 \times 10^{+1}$               | $8.10 \times 10^{-5}$  | $1.08 \times 10^{-3}$  |
| High Density Lipoprotein        | $-8.36 \times 10^{-2}$                 | $-8.17 \times 10^{-2}$               | $5.78 \times 10^{-1}$  |                        |
| Free triiodothyronine           | $-6.37 \times 10^{-2}$                 | $-1.19 \times 10^{-1}$               | $6.55 \times 10^{-4}$  | $1.67 \times 10^{-1}$  |
| Chloride                        | $-4.70 \times 10^{-2}$                 | $-1.70 \times 10^{-1}$               | $9.99 \times 10^{-13}$ | $1.96 \times 10^{-11}$ |
| Albumin                         | $-2.08 \times 10^{-2}$                 | $-2.12 \times 10^{-2}$               | $2.36 \times 10^{-6}$  | $7.54 \times 10^{-4}$  |
| Folate Serum                    | $4.50 \times 10^{-3}$                  | $1.07 \times 10^{-2}$                | $8.67 \times 10^{-4}$  | $1.10 \times 10^{-1}$  |
| Uric Acid                       | $-1.16 \times 10^{-3}$                 | $-8.13 \times 10^{-3}$               | $5.10 \times 10^{-14}$ | $1.17 \times 10^{-7}$  |
| Insulin                         | $4.94 \times 10^{-4}$                  | $6.76 \times 10^{-6}$                | $3.94 \times 10^{-1}$  |                        |
| <b>Diabetes Study (Females)</b> |                                        |                                      |                        |                        |
| Magnesium                       | $-8.66 \times 10^{-1}$                 | $-2.91 \times 10^{+0}$               | $1.44 \times 10^{-4}$  | $2.09 \times 10^{-4}$  |
| Calcium                         | $8.47 \times 10^{-2}$                  | $5.67 \times 10^{-1}$                | $2.72 \times 10^{-1}$  |                        |
| Triglycerides                   | $6.83 \times 10^{-2}$                  | $2.20 \times 10^{-1}$                | $4.46 \times 10^{-2}$  | $7.47 \times 10^{-4}$  |
| Free triiodothyronine           | $-2.29 \times 10^{-2}$                 | $-1.05 \times 10^{+0}$               | $9.26 \times 10^{-4}$  |                        |
| Chloride                        | $-1.82 \times 10^{-2}$                 | $1.93 \times 10^{-2}$                | $6.98 \times 10^{-4}$  | $2.05 \times 10^{-1}$  |
| High Density Lipoprotein        | $-1.36 \times 10^{-2}$                 | $-4.62 \times 10^{-1}$               | $6.17 \times 10^{-1}$  |                        |
| BMI                             | $2.92 \times 10^{-3}$                  | $-1.47 \times 10^{-3}$               | $7.12 \times 10^{-1}$  |                        |
| Vitamin D                       | $2.89 \times 10^{-3}$                  | $3.62 \times 10^{-3}$                | $1.33 \times 10^{-1}$  | $9.41 \times 10^{-1}$  |
| <b>Obesity Study (Males)</b>    |                                        |                                      |                        |                        |
| High Density Lipoprotein        | $-2.18 \times 10^{-1}$                 | $4.05 \times 10^{-1}$                | $7.94 \times 10^{-4}$  | $1.09 \times 10^{-1}$  |
| C-Peptide of insulin            | $2.31 \times 10^{-2}$                  | $3.60 \times 10^{-1}$                | $6.92 \times 10^{-2}$  | $2.99 \times 10^{-1}$  |
| Albumin                         | $-1.69 \times 10^{-2}$                 | $4.52 \times 10^{-3}$                | $4.38 \times 10^{-1}$  | $6.30 \times 10^{-1}$  |
| Free Thyroxine                  | $-1.61 \times 10^{-2}$                 | $-1.40 \times 10^{-1}$               | $4.50 \times 10^{-1}$  |                        |
| HBA1C %                         | $1.22 \times 10^{-2}$                  | $9.83 \times 10^{-2}$                | $2.06 \times 10^{-1}$  |                        |
| Cholesterol                     | $5.70 \times 10^{-3}$                  | $-7.58 \times 10^{-2}$               | $3.71 \times 10^{-1}$  |                        |
| Triglycerides                   | $2.62 \times 10^{-3}$                  | $4.12 \times 10^{-3}$                |                        |                        |
| Vitamin D                       | $-1.22 \times 10^{-3}$                 | $-5.27 \times 10^{-2}$               | $5.18 \times 10^{-1}$  |                        |
| Uric Acid                       | $8.29 \times 10^{-4}$                  | $1.21 \times 10^{-3}$                | $3.23 \times 10^{-5}$  | $7.39 \times 10^{-2}$  |
| ALT (GPT)                       | $7.78 \times 10^{-4}$                  | $-2.11 \times 10^{-2}$               |                        |                        |
| Total Bilirubin                 | $-2.65 \times 10^{-4}$                 | $3.93 \times 10^{-3}$                |                        |                        |
| <b>Obesity Study (Females)</b>  |                                        |                                      |                        |                        |
| High Density Lipoprotein        | $-5.24 \times 10^{-2}$                 | $1.90 \times 10^{-2}$                | $1.84 \times 10^{-1}$  |                        |
| Albumin                         | $-4.12 \times 10^{-2}$                 | $-1.44 \times 10^{-1}$               | $1.90 \times 10^{-9}$  | $3.87 \times 10^{-10}$ |
| Triglycerides                   | $3.78 \times 10^{-2}$                  | $-3.07 \times 10^{-1}$               |                        | $8.12 \times 10^{-1}$  |
| C-Peptide of insulin            | $2.03 \times 10^{-2}$                  | $-2.32 \times 10^{-1}$               | $2.57 \times 10^{-1}$  |                        |
| HBA1C %                         | $1.93 \times 10^{-2}$                  | $-3.57 \times 10^{-1}$               | $1.55 \times 10^{-2}$  |                        |
| Potassium                       | $-1.46 \times 10^{-2}$                 | $-2.41 \times 10^{-2}$               |                        |                        |
| Alkaline Phosphatase            | $1.84 \times 10^{-3}$                  | $4.31 \times 10^{-3}$                | $5.65 \times 10^{-2}$  | $3.86 \times 10^{-1}$  |
| Chloride                        | $-1.49 \times 10^{-3}$                 | $-6.24 \times 10^{-3}$               | $1.03 \times 10^{-1}$  |                        |
| Phosphorus                      | $-1.27 \times 10^{-3}$                 | $-1.02 \times 10^{-1}$               | $3.62 \times 10^{-1}$  |                        |
| Uric Acid                       | $8.94 \times 10^{-4}$                  | $2.14 \times 10^{-3}$                | $3.39 \times 10^{-5}$  | $6.79 \times 10^{-4}$  |

# Machine Learning Methods

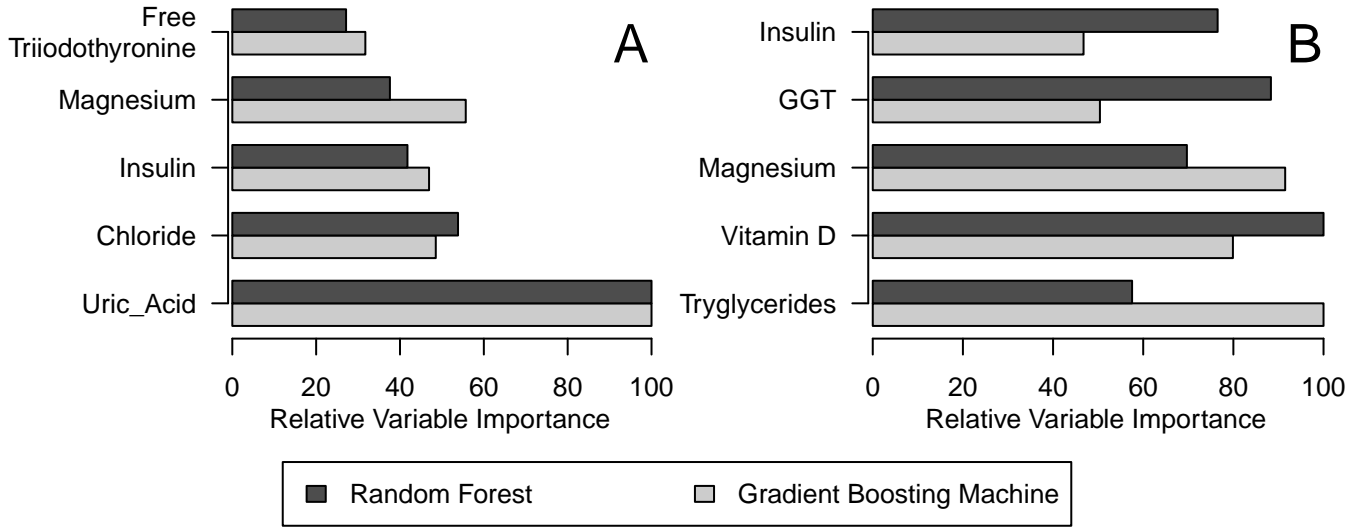

Figure 1: Relative variable importance of top variables of machine learning methods for (A) Males and (B) Females in Diabetes studies.

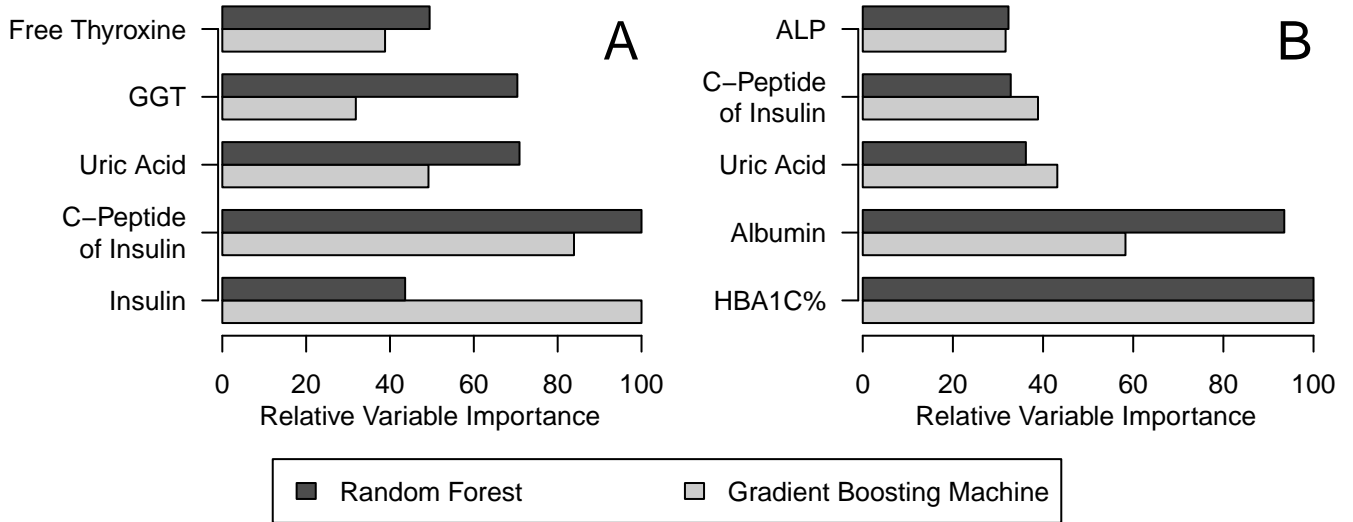

Figure 2: Relative variable importance of top variables of machine learning methods for (A) Males and (B) Females in Obesity studies.
