# Supplementary material for: Harnessing Qatar Biobank to understand type 2 diabetes and obesity in adult Qataris from the First Qatar Biobank Project
Source: Springer Nature journal article supplement (doi:10.1186/s12967-018-1472-0), 2018-04-12
Supplement: MOESM3 [file 15631834]

# Harnessing Qatar Biobank to Understand Type 2 Diabetes and Obesity in Adult Qataris from the First Qatar Biobank Project

Ehsan Ullah, Raghvendra Mall, Reda Rawi, Naima M Moustaid,  
Adeel A Butt, Halima Bensmail

## Baseline Statistics

Table 1: Baseline characteristics for diabetes study. (Rows are sorted by significance)

|                                   |                   |                   |                                |
|-----------------------------------|-------------------|-------------------|--------------------------------|
| Age                               | 50.99 ± 10.03     | 39.01 ± 12.13     | <b>8.60 × 10<sup>-55</sup></b> |
| Chloride                          | 99.44 ± 2.61      | 101.18 ± 1.99     | <b>4.51 × 10<sup>-24</sup></b> |
| Magnesium                         | 0.79 ± 0.08       | 0.84 ± 0.06       | <b>3.50 × 10<sup>-23</sup></b> |
| Triglycerides                     | 1.83 ± 0.96       | 1.39 ± 1.00       | <b>2.03 × 10<sup>-11</sup></b> |
| Albumin                           | 44.25 ± 2.85      | 45.47 ± 2.86      | <b>1.07 × 10<sup>-10</sup></b> |
| BMI                               | 31.39 ± 5.87      | 29.11 ± 6.00      | <b>8.00 × 10<sup>-09</sup></b> |
| Free Triiodothyronine             | 4.31 ± 0.69       | 4.57 ± 0.62       | <b>1.50 × 10<sup>-08</sup></b> |
| Vitamin D                         | 21.69 ± 9.65      | 18.17 ± 9.40      | <b>1.93 × 10<sup>-08</sup></b> |
| Sodium                            | 139.38 ± 2.54     | 140.30 ± 2.25     | <b>2.17 × 10<sup>-08</sup></b> |
| High Density Lipoprotein (HDL-C)  | 1.21 ± 0.33       | 1.34 ± 0.36       | <b>5.25 × 10<sup>-08</sup></b> |
| Alkaline Phosphatase (ALP)        | 76.55 ± 21.07     | 69.42 ± 19.74     | <b>8.22 × 10<sup>-08</sup></b> |
| Insulin                           | 26.97 ± 45.70     | 14.82 ± 19.09     | <b>7.17 × 10<sup>-06</sup></b> |
| GGT                               | 37.04 ± 34.17     | 26.96 ± 34.05     | <b>7.55 × 10<sup>-06</sup></b> |
| C-Reactive Protein                | 8.61 ± 7.45       | 6.72 ± 5.00       | <b>3.97 × 10<sup>-05</sup></b> |
| Uric Acid                         | 283.93 ± 78.53    | 304.45 ± 81.31    | <b>1.13 × 10<sup>-04</sup></b> |
| Total Bilirubin                   | 6.40 ± 3.03       | 7.19 ± 4.37       | <b>5.17 × 10<sup>-04</sup></b> |
| Folate Serum                      | 26.56 ± 7.80      | 24.81 ± 7.94      | <b>7.87 × 10<sup>-04</sup></b> |
| C-Peptide of Insulin              | 3.29 ± 2.14       | 2.83 ± 1.80       | <b>8.36 × 10<sup>-04</sup></b> |
| Vitamin B12                       | 350.38 ± 215.53   | 307.04 ± 162.24   | <b>1.26 × 10<sup>-03</sup></b> |
| Calcium                           | 2.40 ± 0.09       | 2.39 ± 0.10       | <b>2.46 × 10<sup>-03</sup></b> |
| Homocysteine                      | 8.49 ± 2.73       | 8.98 ± 3.05       | <b>8.17 × 10<sup>-03</sup></b> |
| ALT (GPT)                         | 26.25 ± 15.40     | 23.75 ± 21.17     | <b>2.60 × 10<sup>-02</sup></b> |
| Low Density Lipoprotein (LDL-C)   | 2.89 ± 0.96       | 3.01 ± 0.86       | 5.78 × 10 <sup>-02</sup>       |
| Serum Creatinine                  | 65.97 ± 16.43     | 68.33 ± 27.15     | 6.92 × 10 <sup>-02</sup>       |
| Thyroid Stimulating Hormone (TSH) | 1.71 ± 1.23       | 2.04 ± 5.07       | 6.98 × 10 <sup>-02</sup>       |
| Free Thyroxine                    | 13.66 ± 2.02      | 13.51 ± 1.85      | 2.30 × 10 <sup>-01</sup>       |
| Creatine Kinase                   | 108.01 ± 111.32   | 118.72 ± 200.94   | 2.45 × 10 <sup>-01</sup>       |
| Cholesterol                       | 4.92 ± 1.10       | 4.96 ± 0.93       | 5.13 × 10 <sup>-01</sup>       |
| Potassium                         | 4.39 ± 0.31       | 4.38 ± 0.35       | 6.66 × 10 <sup>-01</sup>       |
| AST (GOT)                         | 19.81 ± 8.95      | 20.00 ± 12.51     | 7.73 × 10 <sup>-01</sup>       |
| Hemoglobin                        | 13.63 ± 1.66      | 13.60 ± 1.68      | 7.97 × 10 <sup>-01</sup>       |
| Gender                            | m = 160 ± f = 152 | m = 454 ± f = 444 | 8.25 × 10 <sup>-01</sup>       |
| Phosphorus                        | 1.15 ± 0.17       | 1.15 ± 0.17       | 9.52 × 10 <sup>-01</sup>       |

Table 2: Baseline characteristics for obesity study. (Rows are sorted by significance)

|                                   | <b>Obese (<math>n = 508</math>)</b> | <b>Normal (<math>n = 224</math>)</b> | <b>P-value</b>                           |
|-----------------------------------|-------------------------------------|--------------------------------------|------------------------------------------|
| Albumin                           | 44.07 $\pm$ 2.76                    | 46.58 $\pm$ 2.61                     | <b>1.95 <math>\times 10^{-28}</math></b> |
| Age                               | 45.36 $\pm$ 11.77                   | 35.02 $\pm$ 12.68                    | <b>6.94 <math>\times 10^{-25}</math></b> |
| C-Peptide of Insulin              | 3.43 $\pm$ 2.07                     | 2.17 $\pm$ 1.39                      | <b>1.43 <math>\times 10^{-20}</math></b> |
| Triglycerides                     | 1.61 $\pm$ 1.10                     | 1.10 $\pm$ 0.62                      | <b>5.19 <math>\times 10^{-15}</math></b> |
| HBA1C%                            | 6.53 $\pm$ 1.65                     | 5.71 $\pm$ 1.26                      | <b>6.87 <math>\times 10^{-13}</math></b> |
| Insulin                           | 22.77 $\pm$ 38.85                   | 10.59 $\pm$ 10.95                    | <b>1.54 <math>\times 10^{-10}</math></b> |
| High Density Lipoprotein (HDL-C)  | 1.27 $\pm$ 0.33                     | 1.45 $\pm$ 0.36                      | <b>3.24 <math>\times 10^{-10}</math></b> |
| Magnesium                         | 0.81 $\pm$ 0.07                     | 0.84 $\pm$ 0.06                      | <b>3.61 <math>\times 10^{-08}</math></b> |
| Uric Acid                         | 304.39 $\pm$ 80.52                  | 272.01 $\pm$ 68.71                   | <b>4.25 <math>\times 10^{-08}</math></b> |
| Total Bilirubin                   | 6.19 $\pm$ 3.76                     | 8.23 $\pm$ 4.94                      | <b>7.18 <math>\times 10^{-08}</math></b> |
| Glucose                           | 6.90 $\pm$ 3.42                     | 5.68 $\pm$ 2.67                      | <b>2.79 <math>\times 10^{-07}</math></b> |
| Alkaline Phosphatase (ALP)        | 74.88 $\pm$ 21.26                   | 66.86 $\pm$ 19.06                    | <b>1.47 <math>\times 10^{-06}</math></b> |
| C-Reactive Protein                | 8.26 $\pm$ 6.12                     | 6.27 $\pm$ 5.10                      | <b>6.41 <math>\times 10^{-06}</math></b> |
| GGT                               | 32.80 $\pm$ 41.32                   | 22.93 $\pm$ 24.53                    | <b>6.67 <math>\times 10^{-05}</math></b> |
| Gender                            | m = 203 $\pm$ f = 305               | m = 122 $\pm$ f = 102                | <b>2.62 <math>\times 10^{-04}</math></b> |
| Calcium                           | 2.38 $\pm$ 0.10                     | 2.41 $\pm$ 0.09                      | <b>3.07 <math>\times 10^{-04}</math></b> |
| Cholesterol                       | 4.99 $\pm$ 0.95                     | 4.73 $\pm$ 0.88                      | <b>7.41 <math>\times 10^{-04}</math></b> |
| Hemoglobin                        | 13.25 $\pm$ 1.74                    | 13.73 $\pm$ 1.57                     | <b>7.42 <math>\times 10^{-04}</math></b> |
| Free Triiodothyronine             | 4.44 $\pm$ 0.61                     | 4.56 $\pm$ 0.60                      | <b>1.06 <math>\times 10^{-02}</math></b> |
| Low Density Lipoprotein (LDL-C)   | 2.99 $\pm$ 0.85                     | 2.82 $\pm$ 0.79                      | <b>1.13 <math>\times 10^{-02}</math></b> |
| Free Thyroxine                    | 13.50 $\pm$ 1.90                    | 13.78 $\pm$ 1.59                     | <b>4.00 <math>\times 10^{-02}</math></b> |
| ALT (GPT)                         | 24.42 $\pm$ 19.03                   | 21.21 $\pm$ 24.84                    | 8.61 $\times 10^{-02}$                   |
| Vitamin B12                       | 305.97 $\pm$ 156.28                 | 329.45 $\pm$ 196.98                  | 1.15 $\times 10^{-01}$                   |
| Sodium                            | 139.90 $\pm$ 2.40                   | 140.18 $\pm$ 2.31                    | 1.37 $\times 10^{-01}$                   |
| Chloride                          | 100.60 $\pm$ 2.32                   | 100.86 $\pm$ 2.20                    | 1.44 $\times 10^{-01}$                   |
| Thyroid Stimulating Hormone (TSH) | 1.94 $\pm$ 2.31                     | 1.70 $\pm$ 2.13                      | 1.95 $\times 10^{-01}$                   |
| Folate Serum                      | 25.34 $\pm$ 7.82                    | 24.54 $\pm$ 7.57                     | 1.99 $\times 10^{-01}$                   |
| Phosphorus                        | 1.15 $\pm$ 0.16                     | 1.16 $\pm$ 0.17                      | 2.08 $\times 10^{-01}$                   |
| Serum Creatinine                  | 65.69 $\pm$ 15.78                   | 66.95 $\pm$ 14.47                    | 3.05 $\times 10^{-01}$                   |
| Homocysteine                      | 8.87 $\pm$ 2.93                     | 9.08 $\pm$ 3.53                      | 4.30 $\times 10^{-01}$                   |
| Creatine Kinase                   | 106.70 $\pm$ 90.63                  | 113.89 $\pm$ 164.56                  | 5.39 $\times 10^{-01}$                   |
| Potassium                         | 4.37 $\pm$ 0.32                     | 4.39 $\pm$ 0.37                      | 5.59 $\times 10^{-01}$                   |
| Vitamin D                         | 18.90 $\pm$ 8.48                    | 18.46 $\pm$ 10.99                    | 5.96 $\times 10^{-01}$                   |
| AST (GOT)                         | 19.74 $\pm$ 10.95                   | 19.38 $\pm$ 13.83                    | 7.29 $\times 10^{-01}$                   |
