# Supplementary material for: Harnessing Qatar Biobank to understand type 2 diabetes and obesity in adult Qataris from the First Qatar Biobank Project
Source: Springer Nature journal article supplement (doi:10.1186/s12967-018-1472-0), 2018-04-12
Supplement: MOESM4 [file 15631834]

# Harnessing Qatar Biobank to Understand Type 2 Diabetes and Obesity in Adult Qataris from the First Qatar Biobank Project

Ehsan Ullah, Raghvendra Mall, Reda Rawi, Naima M Moustaid,  
Adeel A Butt, Halima Bensmail

## Survival Analysis

Table 1: Results of scaled Schoenfeld test to validate proportionality assumption

| Variable              | rho   | chisq | P-value |
|-----------------------|-------|-------|---------|
| Hemoglobin            | 0.01  | 0.01  | 0.93    |
| Folate Serum          | -0.01 | 0.01  | 0.93    |
| Total Bilirubin       | -0.01 | 0.02  | 0.90    |
| BMI                   | 0.01  | 0.02  | 0.89    |
| C Reactive Protein    | 0.01  | 0.03  | 0.86    |
| Albumin               | -0.02 | 0.08  | 0.77    |
| Creatine Kinase       | -0.02 | 0.09  | 0.77    |
| LDLC                  | 0.02  | 0.09  | 0.76    |
| Free Thyroxine        | -0.02 | 0.11  | 0.74    |
| Potassium             | -0.03 | 0.17  | 0.68    |
| Sodium                | -0.03 | 0.18  | 0.67    |
| ALP                   | 0.03  | 0.32  | 0.57    |
| ALT (GPT)             | 0.04  | 0.34  | 0.56    |
| Serum Creatinine      | -0.04 | 0.40  | 0.53    |
| Cholesterol           | 0.04  | 0.43  | 0.51    |
| Free Triiodothyronine | 0.05  | 0.50  | 0.48    |
| Phosphorus            | -0.04 | 0.51  | 0.47    |
| Magnesium             | -0.05 | 0.60  | 0.44    |
| Chloride              | -0.06 | 0.61  | 0.43    |
| Calcium               | -0.05 | 0.61  | 0.43    |
| TSH                   | 0.05  | 0.73  | 0.39    |
| AST (GOT)             | 0.07  | 0.86  | 0.35    |
| Gender                | 0.06  | 0.88  | 0.35    |
| Homocysteine          | -0.06 | 1.15  | 0.28    |
| HDLc                  | -0.07 | 1.20  | 0.27    |
| Vitamin B12           | 0.07  | 1.28  | 0.26    |
| GGT                   | 0.10  | 1.95  | 0.16    |
| Uric Acid             | -0.10 | 2.26  | 0.13    |
| Triglycerides         | 0.13  | 4.07  | 0.04    |
